# Supplementary material for: RETRACTED ARTICLE: Effects of waste glass and waste marble on mechanical and durability performance of concrete
Source: PubMed Central journal article supplement (PMC8564529; doi:10.1038/s41598-021-00994-0), 2021-11-02
Supplement: 41598_2021_994_MOESM1_ESM.pdf [file 41598_2021_994_MOESM1_ESM.pdf]

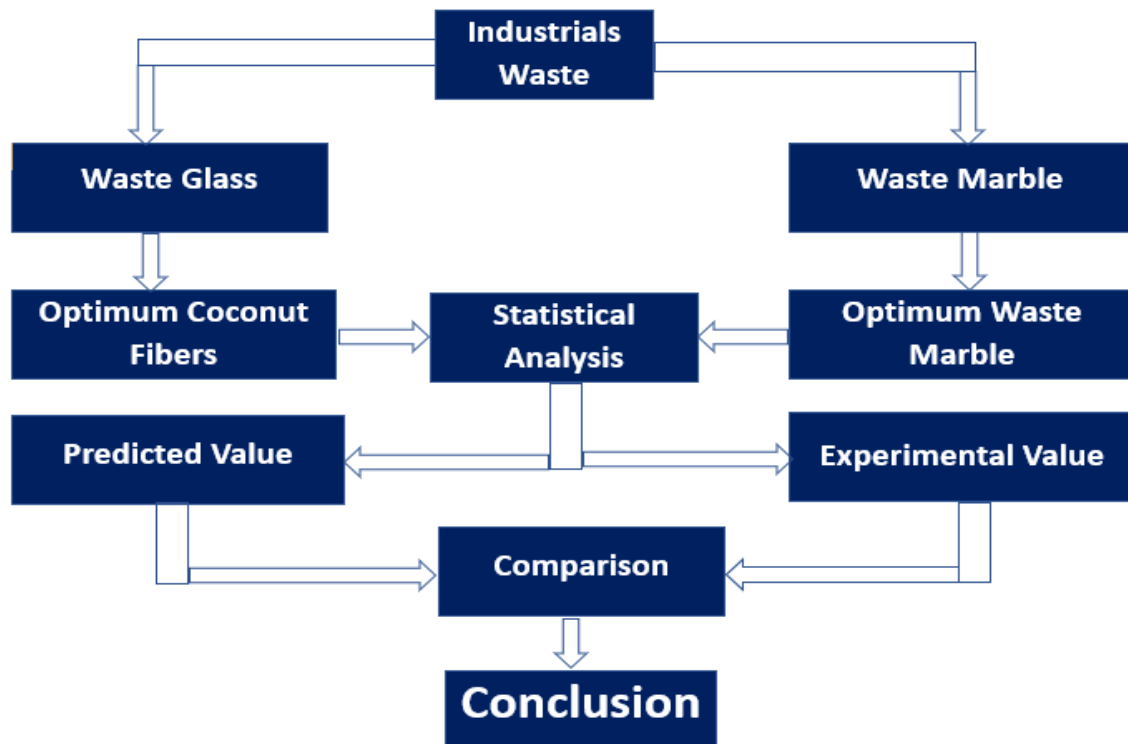

Supplementary **Figure 1** Graphical Abstract

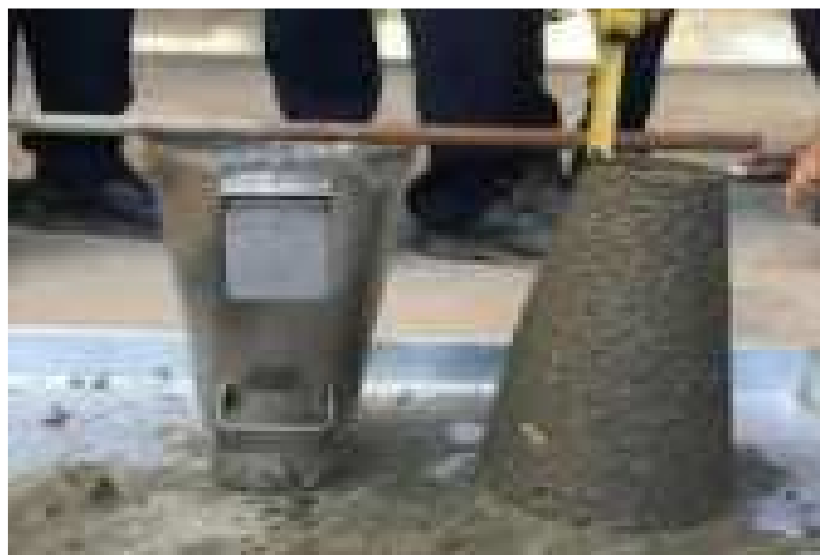

Supplementary **Figure 2** Slump Cone Test

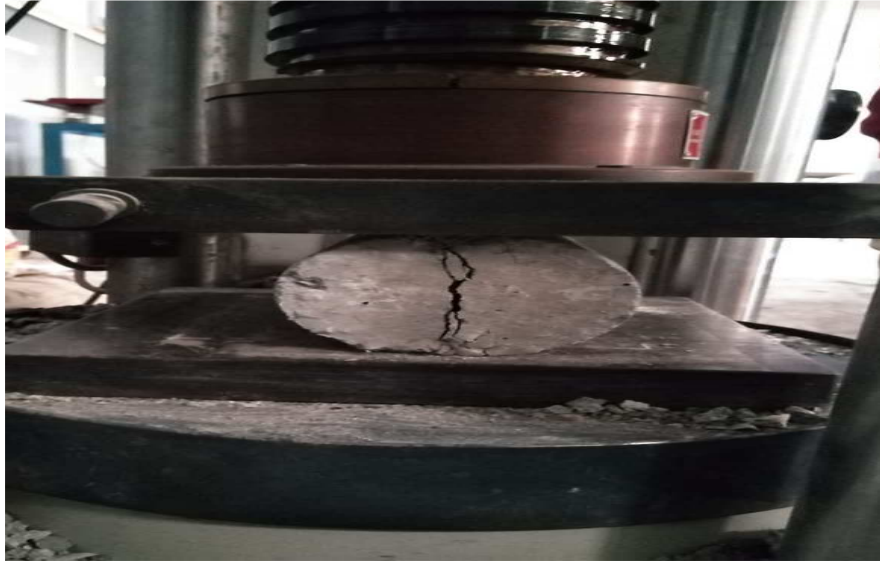

Supplementary Figure 3 Split Tensile Strength Test Setup

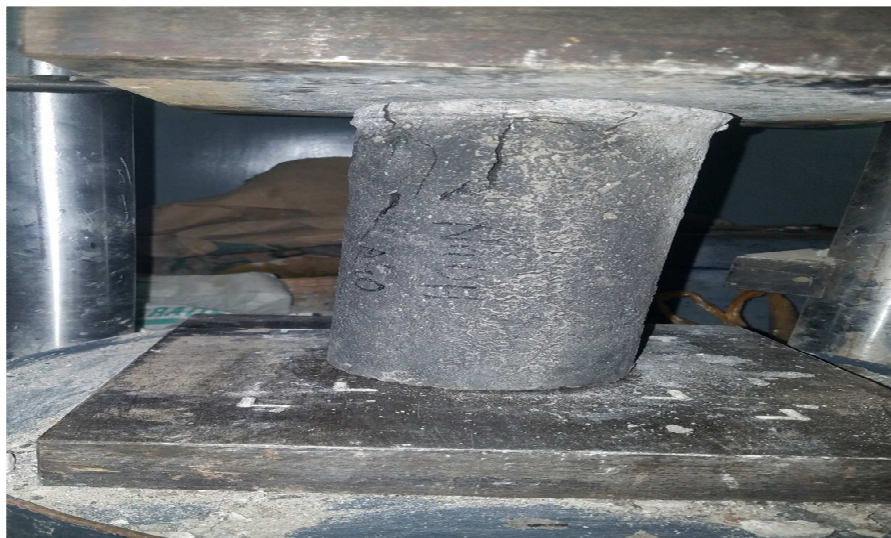

Supplementary Figure 4 Compressive Strength Test Setup
